# Supplementary material for: Evaluation of Latent Models Assessing Physical Fitness and the Healthy Eating Index in Community Studies: Time-, Sex-, and Diabetes-Status Invariance
Source: MDPI journal article supplement (doi:10.3390/nu13124258), 2021-11-26
Supplement: s1 [file s1]

## Supplement to Measurement Paper

**Table S1.** Age and sex specific criteria to achieve maximum scores for each HEI-C component

|                                                                    | Criteria for maximum score |                |                    |                  |
|--------------------------------------------------------------------|----------------------------|----------------|--------------------|------------------|
|                                                                    | Male<br>19-50 yo           | Male<br>51+ yo | Female<br>19-50 yo | Female<br>50+ yo |
| <b>Adequacy</b>                                                    |                            |                |                    |                  |
| Total vegetables and fruit <sup>1</sup><br>Maximum score = 10      | 8                          | 7              | 7                  | 7                |
| Whole fruit <sup>1</sup><br>Maximum score = 5                      | 2                          | 1.5            | 1.5                | 1.5              |
| Dark green and orange vegetables <sup>1</sup><br>Maximum score = 5 | 2                          | 1.5            | 1.5                | 1.5              |
| Total grain products <sup>1</sup><br>Maximum score = 5             | 8                          | 7              | 6                  | 6                |
| Whole grains <sup>1</sup><br>Maximum score = 5                     | 4                          | 3.5            | 3                  | 3                |
| Milk and alternatives <sup>1</sup><br>Maximum score = 10           | 2                          | 3              | 2                  | 3                |
| Meat and alternatives <sup>1</sup><br>Maximum score = 10           | 3                          | 3              | 2                  | 2                |
| Unsaturated Fats <sup>1</sup><br>Maximum score = 10                | 3                          | 3              | 2                  | 2                |
| <b>Moderation</b>                                                  |                            |                |                    |                  |
| Saturated fats <sup>2</sup><br>Maximum score = 10                  | 7%                         | 7%             | 7%                 | 7%               |
| Sodium <sup>3</sup><br>Maximum score = 10                          | 1500 mg                    | 1500 mg        | 1500 mg            | 1500 mg          |
| "Other food" <sup>2</sup><br>Maximum score = 20                    | 5%                         | 5%             | 5%                 | 5%               |

<sup>1</sup>Number of servings recommended in *Eating Well With Canada's Food Guide* [50]

<sup>2</sup>Percent of total energy

<sup>3</sup>Scores for sodium based on Dietary Reference Intakes

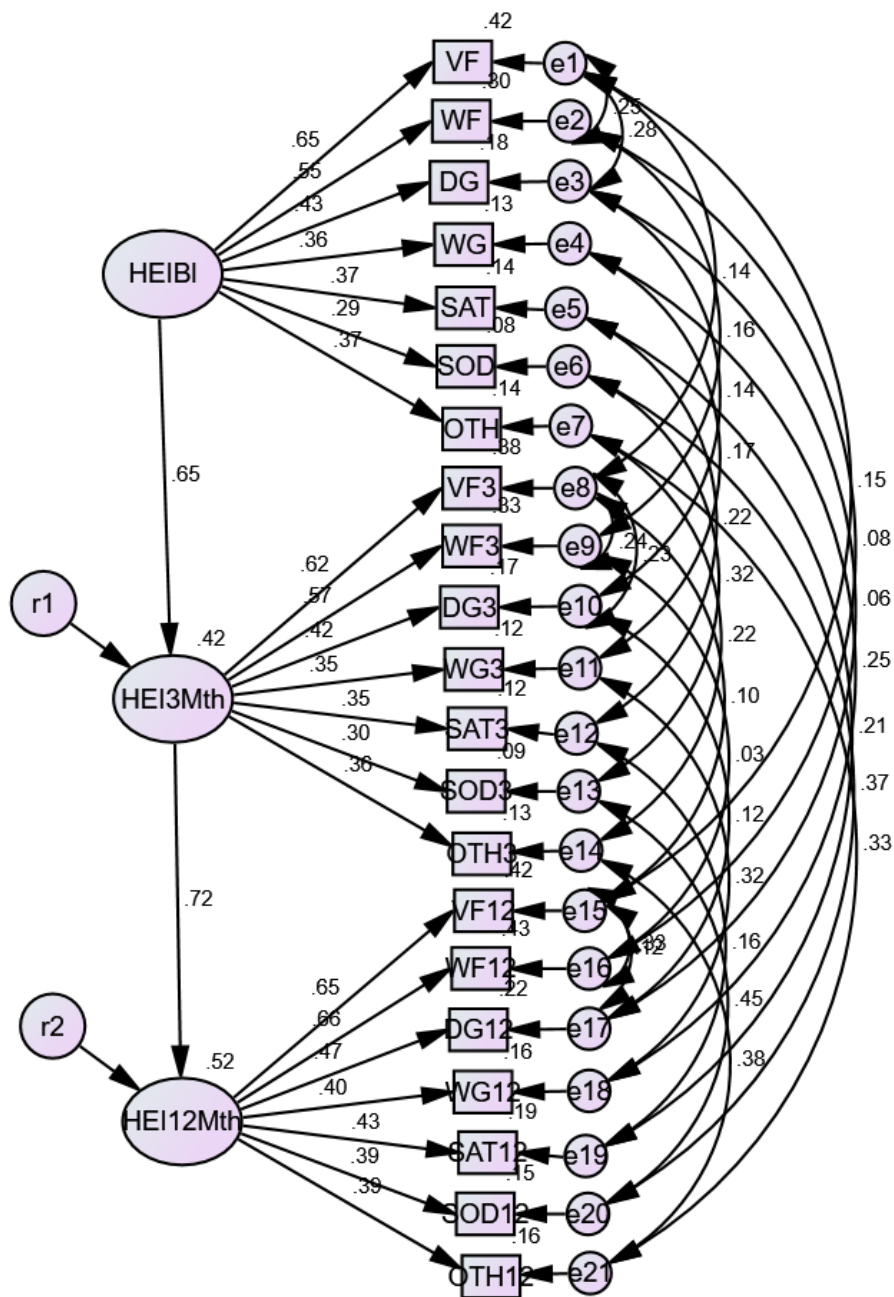

**Figure S1. Longitudinal Invariance of Reduced HEI-C Model.** HEIBI=total HEI-C baseline; HEI3Mth= total HEI-C at 3-months; HEI12Mth=total HEI-C at 12-months; VF=total vegetables and fruit; WF=whole fruit; DG= dark green and orange vegetables; WG= whole grains; SF=saturated fats; SOD=sodium; OTH= Other foods; e# and r#=error terms. Squares are measured variables; circles are latent variables.

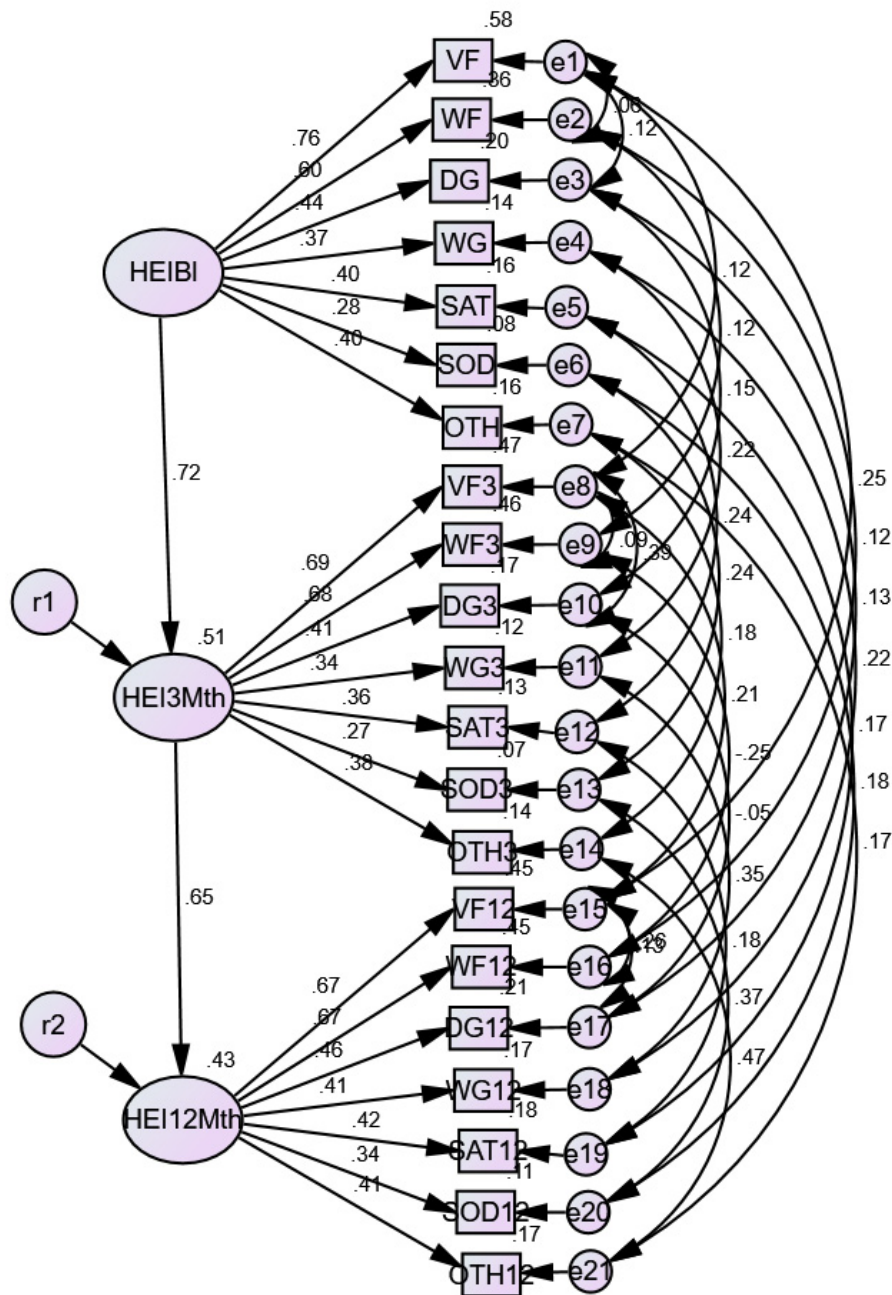

**Figure S2. Sex Invariance of Reduced HEI-C Model.** HEIBI=total HEI-C baseline; HEI3Mth=total HEI-C at 3-months; HEI12Mth=total HEI-C at 12-months; VF=total vegetables and fruit; WF=whole fruit; DG= dark green and orange vegetables; WG= whole grains; SF=saturated fats; SOD=sodium; OTH= Other foods; e# and r#=error terms. Squares are measured variables; circles are latent variables.

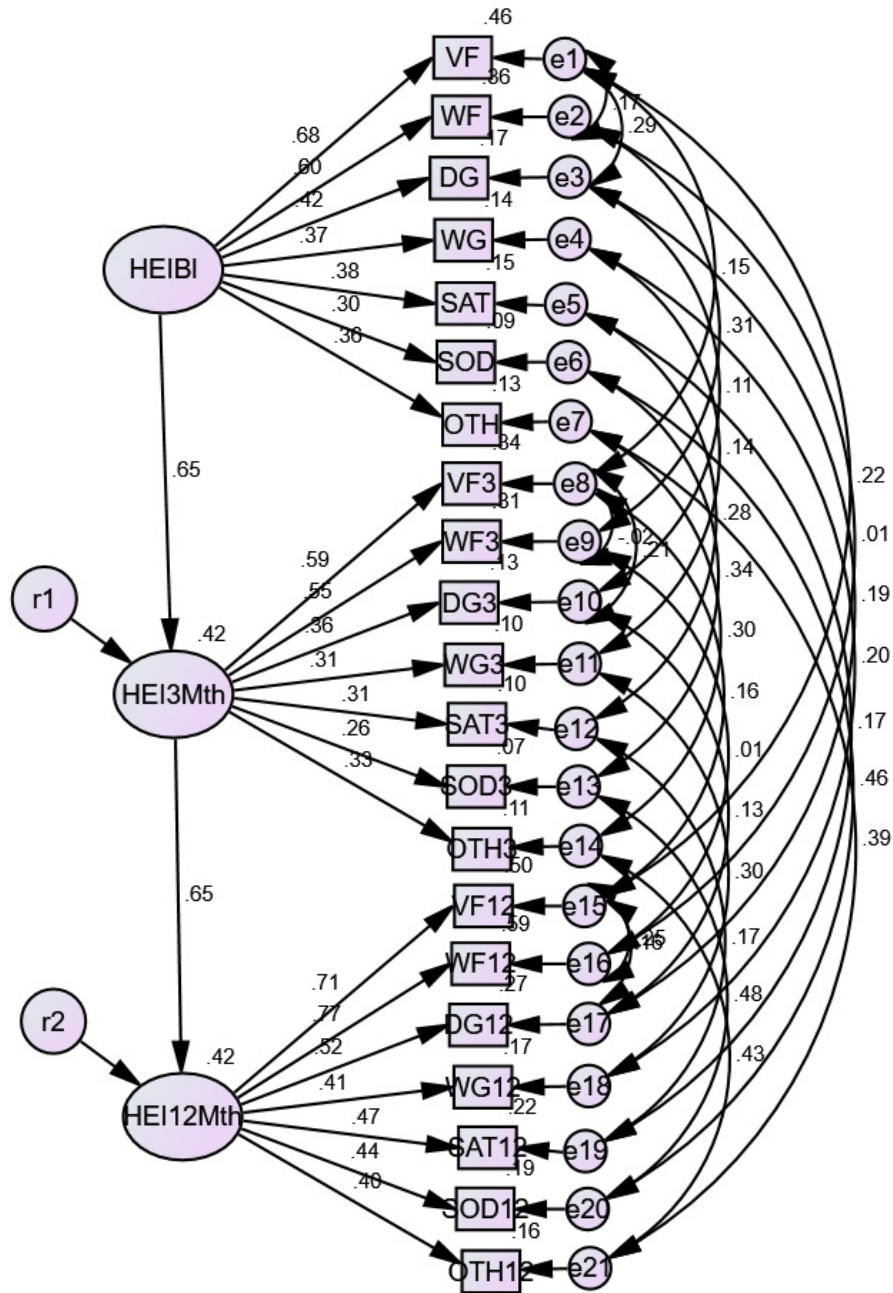

**Figure S3. Disease-State Invariance of Reduced HEI-C Model.** Loadings are identical across the three time points and across disease-states (noDM and DM). HEIBI=total HEI-C baseline; HEI3Mth= total HEI-C at 3-months; HEI12Mth=total HEI-C at 12-months; VF=total vegetables and fruit; WF=whole fruit; DG= dark green and orange vegetables; WG= whole grains; SF=saturated fats; SOD=sodium; OTH= Other foods; e# and r# =error terms. Squares are measured variables; circles are latent variables.

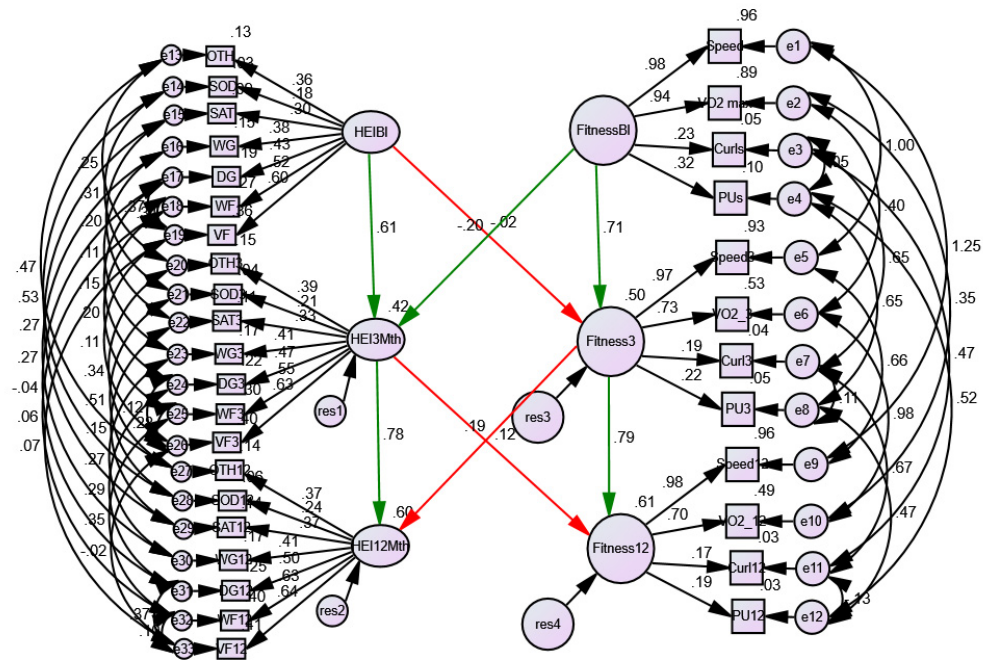

**Figure S4. Results for women** showing structural regressions between HEI and Fitness factors. Regression paths in green show significant results, structural regression in red were not statistically significant. HEI1=total HEI-C baseline; HEI3Mth= total HEI-C at 3-months; HEI12Mth=total HEI-C at 12-months; VF=total vegetables and fruit; WF=whole fruit; DG= dark green and orange vegetables; WG= whole grains; SF=saturated fats; SOD=sodium; OTH= Other foods; e# and r#=error terms. Squares are measured variables; circles are latent variables.

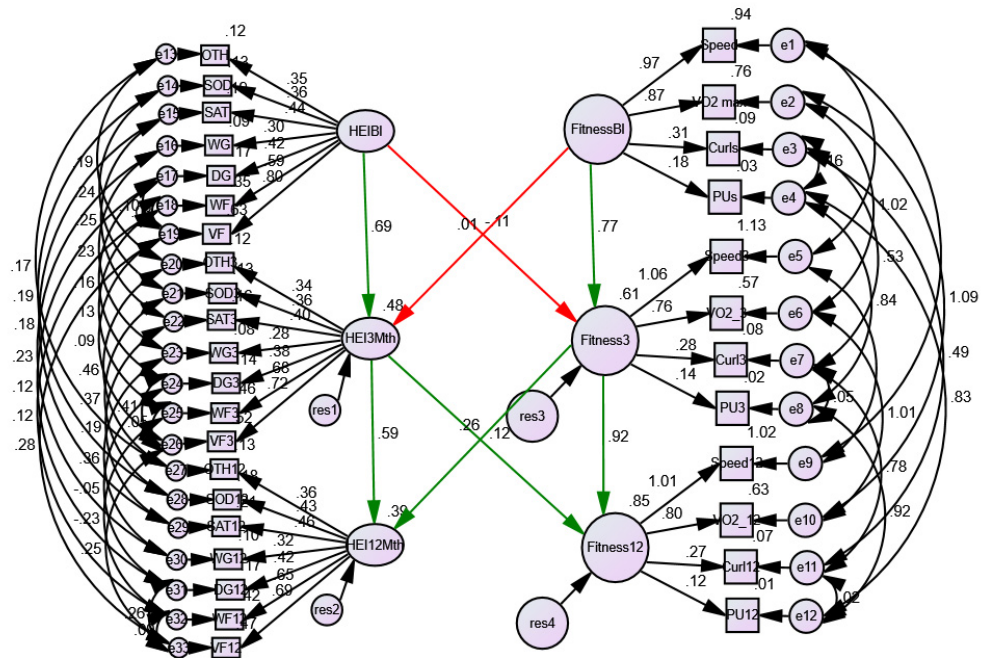

**Figure S5. Results for men** showing structural regressions between HEI and Fitness factors. Regression paths in green show significant results, structural regression in red were not statistically significant. HEI1=total HEI-C baseline; HEI3Mth= total HEI-C at 3-months; HEI12Mth=total HEI-C at 12-months; VF=total vegetables and fruit; WF=whole fruit; DG= dark green and orange vegetables; WG= whole grains; SF=saturated fats; SOD=sodium; OTH= Other foods; e# and r#=error terms. Squares are measured variables; circles are latent variables.



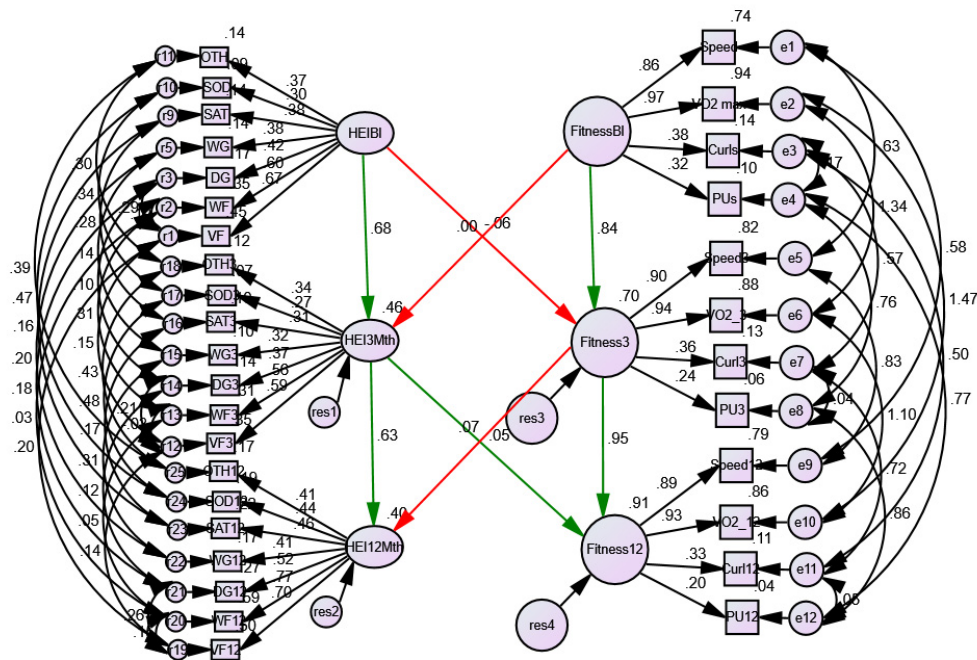

**Figure S6. Overall disease and time invariant results** showing structural regressions between HEI and Fitness factors. Regression paths in green show significant results, structural regression in red were not statistically significant. HEI<sub>Bl</sub>=total HEI-C baseline; HEI<sub>3Mth</sub>= total HEI-C at 3-months; HEI<sub>12Mth</sub>=total HEI-C at 12-months; VF=total vegetables and fruit; WF=whole fruit; DG= dark green and orange vegetables; WG= whole grains; SF=saturated fats; SOD=sodium; OTH= Other foods; e# and r# =error terms.
